# Supplementary material for: Overlooked Potential of Energy Transition Mineral Supply from Above-Ground Sources
Source: Research Square preprint supplement (doi:10.21203/rs.3.rs-7951945/v1), 2025-10-28
Supplement: Supplementary file 1 [file 554858729bfe1c9035213595.docx]

**SI 2 References**

1. Ahmed, S., Li, T., Li, S. Y., & Chen, R. (2025b). Comparative life cycle impact assessment of offshore support vessels powered by alternative fuels for sustainable offshore wind operations using machine learning. Journal of Ocean Engineering and Science, 10(4), 561–579. <https://doi.org/10.1016/j.joes.2023.10.005>
2. Avadí, A., & Fréon, P. (2013a). Life cycle assessment of fisheries: A review for fisheries scientists and managers. Fisheries Research, 143, 21–38. <https://doi.org/10.1016/j.fishres.2013.01.006>
3. Burman, M., Kuttenkeuler, J., Stenius, I., Garme, K., & Rosén, A. (2016a). Comparative Life Cycle Assessment of the hull of a high-speed craft. Proceedings of the Institution of Mechanical Engineers, Part M: Journal of Engineering for the Maritime Environment, 230(2), 378–387. <https://doi.org/10.1177/1475090215580050>
4. Chen, B.-Q., Liu, K., & Xu, S. (2024a). Recent Advances in Aluminum Welding for Marine Structures. Journal of Marine Science and Engineering, 12(9), 1539. <https://doi.org/10.3390/jmse12091539>
5. Chen, Z. S., & Lam, J. S. L. (2022a). Life cycle assessment of diesel and hydrogen power systems in tugboats. Transportation Research Part D: Transport and Environment, 103, 103192. <https://doi.org/10.1016/j.trd.2022.103192>
6. Cucinotta, F., Barberi, E., & Salmeri, F. (2024a). A Review on Navigating Sustainable Naval Design: LCA and Innovations in Energy and Fuel Choices. Journal of Marine Science and Engineering, 12(3), 520. <https://doi.org/10.3390/jmse12030520>
7. Hosseinabadi, O. F., & Khedmati, M. R. (2021a). A review on ultimate strength of aluminium structural elements and systems for marine applications. Ocean Engineering, 232, 109153. <https://doi.org/10.1016/j.oceaneng.2021.109153>
8. Jin, T., Zhang, W., Li, N., Liu, X., Han, L., & Dai, W. (2019a). Surface Characterization and Corrosion Behavior of 90/10 Copper-Nickel Alloy in Marine Environment. Materials, 12(11), 1869. <https://doi.org/10.3390/ma12111869>
9. Pellegrini, M., Saccani, C., & Guzzini, A. (2024a). Environmental Life Cycle Assessment of Innovative Ejectors Plant Technology for Sediment By-Pass in Harbours and Ports. Sustainability, 16(17), 7809. <https://doi.org/10.3390/su16177809>
10. Qin, Q., Tian, M., Pu, J., & Huang, J. (2018a). Constitutive investigation based on the time-hardening model for AH36 material in continuous casting process. Advances in Mechanical Engineering, 10(1), 1687814017750680. <https://doi.org/10.1177/1687814017750680>
11. Quang, P. K., Dong, D. T., & Hai, P. T. T. (2021a). Evaluating environmental impacts of an oil tanker using life cycle assessment method. Proceedings of the Institution of Mechanical Engineers, Part M: Journal of Engineering for the Maritime Environment, 235(3), 705–717. <https://doi.org/10.1177/1475090221989195>
12. Ribeiro, A. C. N., Henein, H., Ivey, D. G., & Brandi, S. D. (2016a). Evaluation of AH36 microalloyed steel welded joint by submerged arc welding process with one and two wires. Materials Research, 19(1), 143–152. <https://doi.org/10.1590/1980-5373-MR-2015-0532>
13. Rousseau, C., Baraud, F., Leleyter, L., & Gil, O. (2009a). Cathodic protection by zinc sacrificial anodes: Impact on marine sediment metallic contamination. Journal of Hazardous Materials, 167(1–3), 953–958. <https://doi.org/10.1016/j.jhazmat.2009.01.083>
14. Tuan, D. D., & Wei, C. (2019a). Cradle-to-gate life cycle assessment of ships: A case study of Panamax bulk carrier. Proceedings of the Institution of Mechanical Engineers, Part M: Journal of Engineering for the Maritime Environment, 233(2), 670–683. <https://doi.org/10.1177/1475090218813731>
15. Wang, H., Boulougouris, E., Theotokatos, G., Zhou, P., Priftis, A., & Shi, G. (2021a). Life cycle analysis and cost assessment of a battery powered ferry. Ocean Engineering, 241, 110029. <https://doi.org/10.1016/j.oceaneng.2021.110029>
16. Yang, L., & Wei, Y. (2023a). Corrosion Evolution of Nickel Aluminum Bronze in Clean and Sulfide-Polluted Solutions. Coatings, 13(5), 846. <https://doi.org/10.3390/coatings13050846>
17. Dong, T., Buzuku, S., Elg, M., Schönborn, A., & Ölcer, A. I. (2024). Environmental Performance of Bulk Carriers Equipped with Synergies of Energy-Saving Technologies and Alternative Fuels. *Journal of Marine Science and Engineering*, *12*(3), 425. <https://doi.org/10.3390/jmse12030425>
18. Syaifullah, Muh., Sade, J., & Paroka, P. (2024). Analysis Of Needs And Placement Of Zinc Anode For New Ferry Ship Buildings. Maritime Park Journal of Maritime Technology and Society, 44–54. <https://doi.org/10.62012/mp.v3i2.35389>
19. **AZoNetwork.** *Navy M Bronze Permanent Cast Alloy (UNS C92200) – Mechanical Properties.* AZoM.com (8 Jan 2013). Available at: [https://www.azom.com/article.aspx?ArticleID=7536&utm_source](https://www.azom.com/article.aspx?ArticleID=7536&utm_source=chatgpt.com) (Accessed: 23 October 2025).
