# Supplementary material for: Overlooked Potential of Energy Transition Mineral Supply from Above-Ground Sources
Source: Research Square preprint supplement (doi:10.21203/rs.3.rs-7951945/v1), 2025-10-28
Supplement: Supplementary file 2 [file 6aed748692e236cb551d8f88.xlsx]

## Sheet: Commercial
Boeing 747
Material	Estimated Amount	Primary Use	References	Peer reviewed Journal/ Reports
Rare-Earth Elements (REEs):
Neodymium (Nd)	~3–5 kg	Permanent magnets in actuators, avionics, and sensors	Materials considerations for aerospace applications	Yes
Dysprosium (Dy)	~0.5–1.0 kg	High-temperature magnets for avionics and navigation systems	Materials considerations for aerospace applications	Yes
Samarium (Sm)	~0.4–0.8 kg	High-temperature magnets and electronics in radar and navigation equipment	Materials considerations for aerospace applications	Yes
Yttrium (Y), Europium (Eu), Terbium (Tb)	Grams to tens of grams combined	Phosphors in cockpit displays, lighting systems, and electronic warfare components	Materials considerations for aerospace applications	Yes
Gadolinium (Gd)	~200–400 grams	Specialized applications in sensors and actuators	Materials considerations for aerospace applications	Yes
Cerium (Ce)	~1–2 kg	Polishing compounds for cockpit displays, minor use in coatings	Materials considerations for aerospace applications	Yes
Lanthanum (La)	~0.5–1 kg	Certain battery technologies, optical sensors, and thermal coatings	Materials considerations for aerospace applications	Yes
Praseodymium (Pr)	~200–500 grams	Magnets in advanced actuators and avionics	Materials considerations for aerospace applications	Yes
Total REEs	~5–7.5 kg
Critical Minerals:
Titanium (Ti)	~10,000–15,000 kg (10–15 metric tons)	Structural components, engine mounts, landing gear, and fuselage	Use of materials in the Boeing 747 (adapted from Brown, 2014)	Yes
Nickel (Ni)	~800–1,200 kg	Superalloys for turbine blades, high-temperature components, and radar systems	Materials for Aircraft Engines - University of Colorado Boulder	Yes
Cobalt (Co)	~150–250 kg	High-temperature alloys for engines, avionics, and radar electronics	Materials for Aircraft Engines - University of Colorado Boulder	Yes
Tungsten (W)	~200–400 kg	Counterweights, vibration damping components, and structural reinforcements	Boeing Use of Depleted Uranium Counterweights in Aircraft	Yes
Chromium (Cr)	~1,000–1,500 kg	Stainless steel for structural supports and engine parts	A Pocket Guide: Stainless Steel Specifications for Military Use	No
Manganese (Mn)	~500–800 kg	Alloying element in structural steels and components	A Pocket Guide: Stainless Steel Specifications for Military Use	No
Lithium (Li)	~2–5 kg	Backup batteries, emergency electronics, and advanced communications gear	UPS 747 Crash Highlights Lithium Battery Danger - FLYING Magazine	No
Hafnium (Hf)	~5–10 kg	Turbine blades and other high-temperature engine components	A pinch of hafnium could extend life of turbine blades	No
Rhenium (Re)	~2–5 kg	High-performance superalloys in engine hot-section components	Rhenium in Aerospace: Enhancing Jet Engines and Superalloys	No
Molybdenum (Mo)	~30–70 kg	Corrosion-resistant alloys in exhaust systems and structural supports	Materials for Aircraft Engines - University of Colorado Boulder	Yes
Zirconium (Zr)	~15–25 kg	High-temperature alloys and thermal barriers	Zirconia-Based Thermal Barrier Coatings Systems for Aero-Industry	Yes
Total Critical Minerals	Varies depending on component and aircraft model
Boeing 737
Material	Estimated Amount	Primary Use	References
Rare-Earth Elements (REEs):
Neodymium (Nd)	~2–4 kg	Permanent magnets in actuators, avionics, and sensors	Materials considerations for aerospace applications	Yes
Dysprosium (Dy)	~0.3–0.6 kg	High-temperature magnets for avionics and navigation systems	Materials considerations for aerospace applications	Yes
Samarium (Sm)	~0.2–0.5 kg	High-temperature magnets and electronics in radar and navigation equipment	Materials considerations for aerospace applications	Yes
Yttrium (Y), Europium (Eu), Terbium (Tb)	Grams to tens of grams combined	Phosphors in cockpit displays, lighting systems, and electronic warfare components	Materials considerations for aerospace applications	Yes
Gadolinium (Gd)	~100–300 grams	Specialized applications in sensors and actuators	Materials considerations for aerospace applications	Yes
Cerium (Ce)	~0.5–1.5 kg	Polishing compounds for cockpit displays, minor use in coatings	Materials considerations for aerospace applications	Yes
Lanthanum (La)	~0.3–0.7 kg	Certain battery technologies, optical sensors, and thermal coatings	Materials considerations for aerospace applications	Yes
Praseodymium (Pr)	~100–300 grams	Magnets in advanced actuators and avionics	Materials considerations for aerospace applications	Yes
Total REEs	~3.5–7 kg
Critical Minerals:
Titanium (Ti)	~5,000–8,000 kg (5–8 metric tons)	Structural components, engine mounts, landing gear, and fuselage	Crafting the Future of Flight with Boeing 737 MAX Aircraft Materials	No
Nickel (Ni)	~600–900 kg	Superalloys for turbine blades, high-temperature components, and radar systems	Materials for Aircraft Engines - University of Colorado Boulder	Yes
Cobalt (Co)	~100–200 kg	High-temperature alloys for engines, avionics, and radar electronics	Materials for Aircraft Engines - University of Colorado Boulder	Yes
Tungsten (W)	~150–300 kg	Counterweights, vibration damping components, and structural reinforcements	Steel component material for Boeing 737 aircraft	No
Chromium (Cr)	~800–1,200 kg	Stainless steel for structural supports and engine parts	Steel component material for Boeing 737 aircraft	No
Manganese (Mn)	~400–700 kg	Alloying element in structural steels and components	Steel component material for Boeing 737 aircraft	No
Lithium (Li)	~1–3 kg	Backup batteries, emergency electronics, and advanced communications gear	UPS 747 Crash Highlights Lithium Battery Danger - FLYING Magazine	No
Hafnium (Hf)	~3–7 kg	Turbine blades and other high-temperature engine components	A pinch of hafnium could extend life of turbine blades	No
Rhenium (Re)	~1–3 kg	High-performance superalloys in engine hot-section components	Rhenium in Aerospace: Enhancing Jet Engines and Superalloys	No
Molybdenum (Mo)	~20–50 kg	Corrosion-resistant alloys in exhaust systems and structural supports	Materials for Aircraft Engines - University of Colorado Boulder	Yes
Zirconium (Zr)	~10–20 kg	High-temperature alloys and thermal barriers	Zirconia-Based Thermal Barrier Coatings Systems for Aero-Industry	Yes
Total Critical Minerals	Varies depending on component and aircraft model
Boeing 757
Material	Estimated Quantity	Primary Use	References
Rare-Earth Elements (REEs):
Neodymium (Nd)	~2–4 kg	Permanent magnets in actuators, avionics, and sensors	Materials considerations for aerospace applications	Yes
Dysprosium (Dy)	~0.3–0.6 kg	High-temperature magnets for avionics and navigation systems	Materials considerations for aerospace applications	Yes
Samarium (Sm)	~0.2–0.5 kg	High-temperature magnets and electronics in radar and navigation equipment	Materials considerations for aerospace applications	Yes
Yttrium (Y), Europium (Eu), Terbium (Tb)	Grams to tens of grams combined	Phosphors in cockpit displays, lighting systems, and electronic warfare components	Materials considerations for aerospace applications	Yes
Gadolinium (Gd)	~100–300 grams	Specialized applications in sensors and actuators	Materials considerations for aerospace applications	Yes
Cerium (Ce)	~0.5–1.5 kg	Polishing compounds for cockpit displays, minor use in coatings	Materials considerations for aerospace applications	Yes
Lanthanum (La)	~0.3–0.7 kg	Certain battery technologies, optical sensors, and thermal coatings	Materials considerations for aerospace applications	Yes
Praseodymium (Pr)	~100–300 grams	Magnets in advanced actuators and avionics	Materials considerations for aerospace applications	Yes
Total REEs	~3.5–7 kg
Critical Minerals:
Titanium (Ti)	~5,000–8,000 kg (5–8 metric tons)	Structural components, engine mounts, landing gear, and fuselage	Material Development of Aerospace Parts	No
Nickel (Ni)	~600–900 kg	Superalloys for turbine blades, high-temperature components, and radar systems	Material Development of Aerospace Parts	No
Cobalt (Co)	~100–200 kg	High-temperature alloys for engines, avionics, and radar electronics	Material Development of Aerospace Parts	No
Tungsten (W)	~150–300 kg	Counterweights, vibration damping components, and structural reinforcements	Material Development of Aerospace Parts	No
Chromium (Cr)	~800–1,200 kg	Stainless steel for structural supports and engine parts	Material Development of Aerospace Parts	No
Manganese (Mn)	~400–700 kg	Alloying element in structural steels and components	Material Development of Aerospace Parts	No
Lithium (Li)	~1–3 kg	Backup batteries, emergency electronics, and advanced communications gear	UPS 747 Crash Highlights Lithium Battery Danger - FLYING Magazine	No
Hafnium (Hf)	~3–7 kg	Turbine blades and other high-temperature engine components	A pinch of hafnium could extend life of turbine blades	No
Rhenium (Re)	~1–3 kg	High-performance superalloys in engine hot-section components	Rhenium in Aerospace: Enhancing Jet Engines and Superalloys	No
Molybdenum (Mo)	~20–50 kg	Corrosion-resistant alloys in exhaust systems and structural supports	Material Development of Aerospace Parts	No
Zirconium (Zr)	~10–20 kg	High-temperature alloys and thermal barriers	Zirconia-Based Thermal Barrier Coatings Systems for Aero-Industry	Yes
Total Critical Minerals	Varies depending on component and aircraft model
Boeing 767
Material	Estimated Quantity	Primary Use	References
Rare-Earth Elements (REEs):
Neodymium (Nd)	~2–4 kg	Permanent magnets in actuators, avionics, and sensors	Materials considerations for aerospace applications	Yes
Dysprosium (Dy)	~0.3–0.6 kg	High-temperature magnets for avionics and navigation systems	Materials considerations for aerospace applications	Yes
Samarium (Sm)	~0.2–0.5 kg	High-temperature magnets and electronics in radar and navigation equipment	Materials considerations for aerospace applications	Yes
Yttrium (Y), Europium (Eu), Terbium (Tb)	Grams to tens of grams combined	Phosphors in cockpit displays, lighting systems, and electronic warfare components	Materials considerations for aerospace applications	Yes
Gadolinium (Gd)	~100–300 grams	Specialized applications in sensors and actuators	Materials considerations for aerospace applications	Yes
Cerium (Ce)	~0.5–1.5 kg	Polishing compounds for cockpit displays, minor use in coatings	Materials considerations for aerospace applications	Yes
Lanthanum (La)	~0.3–0.7 kg	Certain battery technologies, optical sensors, and thermal coatings	Materials considerations for aerospace applications	Yes
Praseodymium (Pr)	~100–300 grams	Magnets in advanced actuators and avionics	Materials considerations for aerospace applications	Yes
Total REEs	~3.5–7 kg
Critical Minerals:
Titanium (Ti)	~5,000–8,000 kg (5–8 metric tons)	Structural components, engine mounts, landing gear, and fuselage	Material and Process Developments on the Boeing 767	Yes
Nickel (Ni)	~600–900 kg	Superalloys for turbine blades, high-temperature components, and radar systems	Materials considerations for aerospace applications	Yes
Cobalt (Co)	~100–200 kg	High-temperature alloys for engines, avionics, and radar electronics	Materials considerations for aerospace applications	Yes
Tungsten (W)	~150–300 kg	Counterweights, vibration damping components, and structural reinforcements	Materials considerations for aerospace applications	Yes
Chromium (Cr)	~800–1,200 kg	Stainless steel for structural supports and engine parts	Materials considerations for aerospace applications	Yes
Manganese (Mn)	~400–700 kg	Alloying element in structural steels and components	Materials considerations for aerospace applications	Yes
Lithium (Li)	~1–3 kg	Backup batteries, emergency electronics, and advanced communications gear	UPS 747 Crash Highlights Lithium Battery Danger - FLYING Magazine	No
Hafnium (Hf)	~3–7 kg	Turbine blades and other high-temperature engine components	A pinch of hafnium could extend life of turbine blades	No
Rhenium (Re)	~1–3 kg	High-performance superalloys in engine hot-section components	Rhenium in Aerospace: Enhancing Jet Engines and Superalloys	No
Molybdenum (Mo)	~20–50 kg	Corrosion-resistant alloys in exhaust systems and structural supports	Materials considerations for aerospace applications	Yes
Zirconium (Zr)	~10–20 kg	High-temperature alloys and thermal barriers	Zirconia-Based Thermal Barrier Coatings Systems for Aero-Industry	Yes
Total Critical Minerals	Varies depending on component and aircraft model
Boeing 777
Material	Est. qty (kg)	Principal aerospace use on B-777	References
Rare-earth elements (REEs)
Neodymium (Nd)	5 – 7	Nd-Fe-B permanent-magnet rotors in electromechanical actuators, trim-tabs, fuel-valve servos and flight-control computers	SpringerLink	Yes
Dysprosium (Dy)	0.8 – 1.2	Added to Nd-Fe-B magnets to retain coercivity at >150 °C in wing-root actuators & radar drives	SpringerLink	Yes
Samarium (Sm)	0.5 – 0.8	Sm-Co magnets in high-temp GE90 accessory-gearbox sensors & FADEC	SpringerLink	Yes
Y, Eu, Tb (phosphors)	grams – tens g	Y₂O₃:Eu red & YAG:Tb green phosphors in night-vision-compatible cockpit LCD/CRT back-lights	SpringerLink	Yes
Gadolinium (Gd)	0.3 – 0.5	Gd-based magnetostrictive alloys in active-vibration sensors for cabin floor beams	SpringerLink	Yes
Cerium (Ce)	1.5 – 2.5	Ce-oxide slurry for polishing windshield & MFD optics; trace in corrosion--protective primers	SpringerLink	Yes
Lanthanum (La)	0.8 – 1.5	La-Ni-based hydrogen-storage electrodes in emergency beacons & standby batteries	SpringerLink	Yes
Praseodymium (Pr)	0.2 – 0.5	Pr-doped Nd-Fe-B magnets in high-torque spoiler servo-motors	SpringerLink	Yes
Total REEs	≈ 7 – 10 kg
Critical minerals / strategic metals
Titanium (Ti)	12 000 – 18 000	Wing-box chords, engine pylons, floor beams, Ti-10V-2Fe-3Al main-gear beam	ResearchGate	ResearchGate	Yes
Nickel (Ni)	1 200 – 1 600	Ni-base single-crystal turbine blades/vanes, Inconel 718 APU mounts	University of Colorado Boulder
Cobalt (Co)	250 – 350	Co-rich γ′/γ″ phases in GE90 hot-section super-alloys	University of Colorado Boulder	Yes
Rhenium (Re)	3 – 5	3–6 wt % Re in CMSX-4/-10 single-crystal blade alloy, raising creep limit	Flight Global	No
Hafnium (Hf)	8 – 12	Hf-carbide–strengthened bond-coat in GE90 first-stage vanes	University of Colorado Boulder	Yes
Molybdenum (Mo)	70 – 120	Mo-rich solid-solution strengtheners in disks & exhaust nozzle seals	University of Colorado Boulder	Yes
Chromium (Cr)	1 300 – 2 000	18-21 % Cr stainless hard-points, firewalls, corrosion-resistant fasteners	University of Colorado Boulder	Yes
Manganese (Mn)	800 – 1 300	Mn-bearing HSLA steels in flap-track beams & cargo-door frames	University of Colorado Boulder	Yes
Tungsten (W)	300 – 450	W-heavy-alloy balancer blocks in elevators & ailerons; flutter suppression masses	Vulcan	No
Lithium (Li)	4 – 10	Rechargeable & non-rechargeable Li-ion/-metal cells powering SAT-com handset, standby instruments, APU start	Federal Register	Yes
Zirconium (Zr)	20 – 30	Y-stabilised ZrO₂ thermal-barrier coatings on combustor liners & HPT shrouds	ResearchGate	Yes
Total-critical minerals	values vary by block/variant
Airbus 318
Material	Est. quantity in A318*	Principal use on A318	References
Rare-earth elements
Neodymium (Nd)	≈ 2 – 3 kg	Nd-Fe-B permanent magnets in aileron & elevator EMA actuators, FADEC servo-motors, fuel-valve drives	“Materials considerations for aerospace applications” — MRS Bulletin ResearchGate		Yes
Dysprosium (Dy)	0.3 – 0.5 kg	Dy‐doping keeps Nd-Fe-B coercivity at ≥150 °C for wing-root actuators & radar drives	same as above ResearchGate	Yes
Samarium (Sm)	0.2 – 0.4 kg	Sm-Co magnets in high-temperature spool-speed pick-offs on CFM56 accessory gearbox	same ResearchGate	Yes
Y, Eu, Tb	g – 10 g	Y₂O₃:Eu red & YAG:Tb green phosphors in EFIS/LCD back-lights & panel lamps	same ResearchGate	Yes
Gadolinium (Gd)	0.2 – 0.3 kg	Gd-based magnetostrictive sensors in vibration-monitoring accelerometers	same ResearchGate	Yes
Cerium (Ce)	0.5 – 1 kg	Ce-oxide polishing slurry for windshield & LCD cover-glass; trace in primer pigments	same ResearchGate	Yes
Lanthanum (La)	0.3 – 0.5 kg	La-Ni hydride electrodes in emergency-locator & back-up batteries	same ResearchGate	Yes
Praseodymium (Pr)	0.1 – 0.3 kg	Pr-rich Nd-Fe-B magnets in high-torque flap-track servo-motors	same ResearchGate	Yes
Total REEs	≈ 3 – 5 kg
Critical / strategic minerals
Titanium (Ti)	≈ 12 000 – 20 000 kg	Ti-6Al-4V upper wing-box chords, nose-gear trunnion beam, engine pylons	TIMET “Commercial Aerospace” overview (single-aisle Ti share) Timet	No
Nickel (Ni)	600 – 900 kg	Ni-base René N5 / CMSX-4 HPT blades & vanes in CFM56-5B	“Service experience with single-crystal super-alloys for HPT” (CFM56) reports.nlr.nl	Yes
Cobalt (Co)	100 – 180 kg	Co-bearing γ′ super-alloy matrix in HPT blades; magnetic alloys in APU genset	same reports.nlr.nl	Yes
Rhenium (Re)	≈ 1 – 2 kg	1.5 wt % Re in René N515 single-crystal blades (CFM56-5B HPT)	CFM56 Re-reduction note on Rhenium page Wikipedia	No
Hafnium (Hf)	3 – 6 kg	Hf-doped bond-coats & DS vane alloys—extends TBC life	“A pinch of hafnium could extend life of turbine blades” — Machine Design Home	No
Molybdenum (Mo)	20 – 40 kg	Mo solid-solution-strengthening in turbine disks & exhaust nozzle seals	same super-alloy paper reports.nlr.nl	Yes
Chromium (Cr)	600 – 1 000 kg	18–21 % Cr stainless firewalls, pressure-bulkhead structure	“Materials considerations … aerospace” ResearchGate	Yes
Manganese (Mn)	300 – 500 kg	Mn in HSLA seat-track rails and flap-track beams	same ResearchGate	Yes
Tungsten (W)	150 – 250 kg	W-heavy-alloy elevator & aileron balance weights (CG control)	“Tungsten alloy counterweights in aircraft” – Chinatungsten tech note chinatungsten.com	No
Lithium (Li)	1 – 3 kg	Li-ion cockpit UPS & ELT batteries	UPS lithium-battery safety article (Flying Mag)	No
Zirconium (Zr)	10 – 15 kg	7–8 % Y₂O₃-stabilised ZrO₂ TBCs on HPT shrouds & combustor liners	“Zirconia-based thermal-barrier coatings for aero-industry” ResearchGate	Yes
Airbus 319
Material	Est. quantity in A319	Typical use on the aircraft	References
Rare-earth elements
Neodymium (Nd)	3 – 4 kg	Nd-Fe-B magnets in spoiler/flap EMAs, fuel-metering valves, cockpit servo-motors	Rare-earth magnets overview (MRS Bull.) SpringerLink	Yes
Dysprosium (Dy)	0.5 – 0.7 kg	Dy-doped Nd-Fe-B magnets for >150 °C operation in wing-root actuators / radar drives	same SpringerLink	Yes
Samarium (Sm)	0.3 – 0.5 kg	Sm-Co magnets in high-temp shaft-speed pick-offs on CFM56 accessory gearbox	same SpringerLink	Yes
Y, Eu, Tb	grams – tens g	Y₂O₃:Eu & YAG:Tb phosphors in EFIS/LCD back-lights	same SpringerLink	Yes
Gadolinium (Gd)	0.2 – 0.4 kg	Gd-based magnetostrictive accelerometers for vibration monitoring	same SpringerLink	Yes
Cerium (Ce)	0.5 – 1 kg	Ce-oxide polishing slurry for windshield & MFD optics	same SpringerLink	Yes
Lanthanum (La)	0.4 – 0.6 kg	La-Ni hydride electrodes in ELT / UPS battery packs	same SpringerLink	Yes
Praseodymium (Pr)	0.15 – 0.3 kg	Pr-rich Nd-Fe-B magnets in trim-tab servo-motors	same SpringerLink	Yes
Total REEs	≈ 4 – 6 kg
Critical / strategic minerals
Titanium (Ti)	13 000 – 20 000 kg	Ti-6Al-4V wing-box chords, nose-gear beam, engine pylons (≈ 12–15 % of structure)	Airbus Ti-supply article airlineweekly.skift.com	No
Nickel (Ni)	700 – 1 100 kg	Ni-base René/N5 single-crystal HPT blades & vanes (CFM56/V2500)	Super-alloy service paper reports.nlr.nl	Yes
Cobalt (Co)	120 – 200 kg	γ′ matrix of turbine airfoils; magnetic alloys in APU genset	same reports.nlr.nl	Yes
Rhenium (Re)	1 – 2 kg	1.5–3 wt % Re in René N515/N5 single-crystal blades	Re content note (CFM56) Wikipedia	No
Hafnium (Hf)	4 – 8 kg	Hf-doped bond-coats to extend TBC life in HPT vanes	Hafnium demand article rawmaterials.net	No
Molybdenum (Mo)	25 – 45 kg	Mo solid-solution strength in turbine disks & exhaust seals	same super-alloy ref reports.nlr.nl	Yes
Chromium (Cr)	800 – 1 200 kg	18–21 % Cr stainless firewalls, pressure-bulkhead parts	MRS-Bulletin review SpringerLink	Yes
Manganese (Mn)	400 – 700 kg	HSLA steel seat-track rails & flap-track beams	same SpringerLink	Yes
Tungsten (W)	150 – 250 kg	W-heavy-alloy aileron & elevator balance weights	Tungsten-counterweight note Heavy Metal Tungsten Alloy	No
Lithium (Li)	1 – 3 kg	Li-ion standby & ELT batteries	Lithium-battery safety article SpringerLink	Yes
Zirconium (Zr)	10 – 15 kg	7–8 % Y₂O₃-stabilised ZrO₂ thermal-barrier coatings on combustor & HPT shrouds	ZrO₂ TBC review ResearchGate	Yes
Total critical minerals	vary with engine/option fit
Airbus 320
Material	Est. quantity (kg)	Main use on A320	References
Rare-earth elements
Neodymium (Nd)	3 – 4	Nd-Fe-B magnets in flap/aileron EMAs, fuel-valve & spoiler servos, EFCS computers	MRS Bull. “Materials considerations for aerospace applications” SpringerLink	Yes
Dysprosium (Dy)	0.5 – 0.7	Dy-doped Nd-Fe-B for ≥150 °C actuator & radar-drive magnets	same SpringerLink	Yes
Samarium (Sm)	0.3 – 0.5	Sm-Co magnets in high-temp shaft-speed pick-offs (CFM56/V2500)	same SpringerLink	Yes
Y, Eu, Tb	g – tens g	Y₂O₃:Eu / YAG:Tb phosphors in EFIS LCD back-lights & panel lamps	same SpringerLink	Yes
Gadolinium (Gd)	0.2 – 0.4	Gd-based magnetostrictive vibration sensors	same SpringerLink	Yes
Cerium (Ce)	0.5 – 1	CeO₂ polishing slurry for windscreens & MFD optics; anticorrosion primers	same SpringerLink	Yes
Lanthanum (La)	0.4 – 0.6	La-Ni hydride electrodes in ELT & UPS batteries	same SpringerLink	Yes
Praseodymium (Pr)	0.15 – 0.3	Pr-enriched Nd-Fe-B magnets in trim-tab servos	same SpringerLink	Yes
Total REEs	≈ 4 – 6 kg
Critical / strategic minerals
Titanium (Ti)	1 500 – 2 500	Ti-6Al-4V wing-box chords, nose-gear beam, pylon fittings (≈ 3–5 % of OEW)	EU-JRC briefing: A320/B737 use “3–5 % Ti by weight” RMIS - Raw Materials Information System	Yes
Nickel (Ni)	500 – 800	Ni-base single-crystal HPT blades/vanes & Inconel 718 disks (CFM56/V2500)	Pratt & Whitney Alloy 718 & super-alloy papers Home	No
Cobalt (Co)	80 – 150	γ′ matrix of turbine blades; magnetic alloys in APU starter-generators	same Home	No
Rhenium (Re)	1 – 2	1–3 wt % Re in single-crystal blade alloy René N5 (CFM56 HPT)	Wikipedia “Rhenium – super-alloys contain up to 6 %” Wikipedia	No
Hafnium (Hf)	3 – 6	Hf-doped bond-coats prolong thermal-barrier-coating (TBC) life	Machine Design hafnium-TBC article
Molybdenum (Mo)	20 – 40	Mo solid-solution-strengthening in turbine disks & exhaust seals	same super-alloy ref Home	No
Chromium (Cr)	600 – 1 000	18-21 % Cr stainless firewalls, pressure-bulkhead parts	MRS Bulletin review SpringerLink	Yes
Manganese (Mn)	300 – 500	Mn-bearing HSLA seat-track rails & flap-track beams	same SpringerLink	Yes
Tungsten (W)	150 – 250	W-heavy-alloy aileron/elevator balance weights	Chinatungsten counterweight note China Tungsten Online	No
Lithium (Li)	1 – 3	Saft Li-ion standby/ELT batteries	Airbus “Lithium batteries: safe to fly?” Safety First	No
Zirconium (Zr)	10 – 15	7–8 % Y₂O₃-stabilised ZrO₂ TBCs on combustor & HPT shrouds	ZrO₂ TBC review ResearchGate	Yes
Total critical minerals	vary with engine & option fit
Airbus 321
Material	Estimated Quantity	Primary Use in A321	Reference
Rare-Earth Elements (REEs):
Neodymium (Nd)	~3–4 kg	Permanent magnets in actuators, sensors, and flight control systems	Rare Earths Explained - Milken Institute Review	Yes
Dysprosium (Dy)	~0.5–0.7 kg	Enhances thermal stability of NdFeB magnets in high-temperature environments	[Rare-Earth Uncertainty
Samarium (Sm)	~0.3–0.5 kg	High-temperature magnets in engine components and sensors	[Rare-Earth Uncertainty
Yttrium (Y), Europium (Eu), Terbium (Tb)	Grams to tens of grams	Phosphors in cockpit displays and lighting systems	[Rare-Earth Uncertainty
Gadolinium (Gd)	~0.2–0.4 kg	Used in sensors and actuators for vibration damping	[Rare-Earth Uncertainty
Cerium (Ce)	~0.5–1 kg	Polishing agents for glass surfaces and as catalysts in coatings	[Rare-Earth Uncertainty
Lanthanum (La)	~0.4–0.6 kg	Battery electrodes and optical glasses	[Rare-Earth Uncertainty
Praseodymium (Pr)	~0.15–0.3 kg	Alloying agent in high-strength metals for engine components	[Rare-Earth Uncertainty
Total REEs	~4–6 kg
Critical Minerals:
Titanium (Ti)	~1,500–2,500 kg	Structural components like landing gear, engine pylons, and airframe parts	End-of-life Reusing, recycling, rethinking - Airbus	No
Nickel (Ni)	~500–800 kg	Superalloys in engine turbines and other high-temperature components	Assessment of Critical Resource Use in Aircraft Manufacturing	Yes
Cobalt (Co)	~80–150 kg	Superalloys in engine components and batteries	Assessment of Critical Resource Use in Aircraft Manufacturing	Yes
Rhenium (Re)	~1–2 kg	Enhances creep strength in turbine blades	Assessment of Critical Resource Use in Aircraft Manufacturing	Yes
Hafnium (Hf)	~3–6 kg	Used in turbine blade coatings for thermal resistance	Assessment of Critical Resource Use in Aircraft Manufacturing	Yes
Molybdenum (Mo)	~20–40 kg	Strengthens steel alloys used in various aircraft components	Assessment of Critical Resource Use in Aircraft Manufacturing	Yes
Chromium (Cr)	~600–1,000 kg	Corrosion-resistant coatings and stainless steel components	Assessment of Critical Resource Use in Aircraft Manufacturing	Yes
Manganese (Mn)	~300–500 kg	Alloying element in steel for structural components	Assessment of Critical Resource Use in Aircraft Manufacturing	Yes
Tungsten (W)	~150–250 kg	Counterweights and vibration dampening components	Assessment of Critical Resource Use in Aircraft Manufacturing	Yes
Lithium (Li)	~1–3 kg	Batteries for emergency systems and avionics	Assessment of Critical Resource Use in Aircraft Manufacturing	Yes
Zirconium (Zr)	~10–15 kg	Thermal barrier coatings in engine components	Assessment of Critical Resource Use in Aircraft Manufacturing	Yes
Total Critical Minerals	Varies by configuration
Airbus 330
Material	Estimated Quantity	Primary Use in A330	Reference
Rare-Earth Elements (REEs):
Neodymium (Nd)	~5–7 kg	Permanent magnets in actuators, sensors, and flight control systems	Rare Earths at Bear Lodge - Rare Element Resources	No
Dysprosium (Dy)	~0.8–1.2 kg	Enhances thermal stability of NdFeB magnets in high-temperature environments	Rare Earths at Bear Lodge - Rare Element Resources	No
Samarium (Sm)	~0.5–0.8 kg	High-temperature magnets in engine components and sensors	Rare Earths at Bear Lodge - Rare Element Resources	No
Yttrium (Y), Europium (Eu), Terbium (Tb)	Grams to tens of grams	Phosphors in cockpit displays and lighting systems	Rare Earths at Bear Lodge - Rare Element Resources	No
Gadolinium (Gd)	~0.3–0.5 kg	Used in sensors and actuators for vibration damping	Rare Earths at Bear Lodge - Rare Element Resources	No
Cerium (Ce)	~1.5–2.5 kg	Polishing agents for glass surfaces and as catalysts in coatings	Rare Earths at Bear Lodge - Rare Element Resources	No
Lanthanum (La)	~0.8–1.5 kg	Battery electrodes and optical glasses	Rare Earths at Bear Lodge - Rare Element Resources	No
Praseodymium (Pr)	~0.2–0.5 kg	Alloying agent in high-strength metals for engine components	Rare Earths at Bear Lodge - Rare Element Resources	No
Total REEs	~7–10 kg
Critical Minerals:
Titanium (Ti)	~15,000–20,000 kg	Structural components like landing gear, engine pylons, and airframe parts	Titanium - Wikipedia	No
Nickel (Ni)	~1,200–1,600 kg	Superalloys in engine turbines and other high-temperature components	Manufacturing Technology for Aerospace Structural Materials	Yes
Cobalt (Co)	~250–350 kg	Superalloys in engine components and batteries	Manufacturing Technology for Aerospace Structural Materials	Yes
Rhenium (Re)	~3–5 kg	Enhances creep strength in turbine blades	Aerospace Materials	Yes
Hafnium (Hf)	~8–12 kg	Used in turbine blade coatings for thermal resistance	Aerospace Materials	Yes
Molybdenum (Mo)	~70–120 kg	Strengthens steel alloys used in various aircraft components	Aerospace Materials	Yes
Chromium (Cr)	~1,300–2,000 kg	Corrosion-resistant coatings and stainless steel components	Aerospace Materials	Yes
Manganese (Mn)	~800–1,300 kg	Alloying element in steel for structural components	Aerospace Materials	Yes
Tungsten (W)	~300–450 kg	Counterweights and vibration dampening components	Aerospace Materials	Yes
Lithium (Li)	~4–10 kg	Batteries for emergency systems and avionics	Aerospace Materials	Yes
Zirconium (Zr)	~20–30 kg	Thermal barrier coatings in engine components	Aerospace Materials	Yes
Total Critical Minerals	Varies by configuration
Airbus 340
Material	Order-of-magnitude quantity (kg)	Typical role on the A340	References
Rare-earth elements
Neodymium (Nd)	6 – 8	Nd-Fe-B permanent magnets in aileron/spoiler electro-mechanical actuators, fuel-metering servos & flight-control computers	SpringerLink	Yes
Dysprosium (Dy)	0.8 – 1.2	Dy-doping raises coercivity of the same Nd-Fe-B magnets for >150 °C wing-root & radar drives	SpringerLink	Yes
Samarium (Sm)	0.5 – 0.8	Sm-Co magnets in high-temperature shaft-speed pick-offs on CFM56 / Trent accessory gear-boxes	SpringerLink	Yes
Y, Eu, Tb (phosphors)	g – tens g	YAG:Tb / Y₂O₃:Eu phosphors in EFIS/LCD back-lights & panel lamps	SpringerLink	Yes
Gadolinium (Gd)	0.3 – 0.5	Gd-based magnetostrictive accelerometers for structural-health & vibration monitoring	SpringerLink	Yes
Cerium (Ce)	1.5 – 2.5	CeO₂ polishing slurry for windscreens & camera optics; anticorrosion primer pigments	SpringerLink	Yes
Lanthanum (La)	0.8 – 1.5	La-Ni hydride electrodes in ELT and cockpit UPS battery packs	SpringerLink	Yes
Praseodymium (Pr)	0.2 – 0.5	Pr-rich Nd-Fe-B magnets in high-torque trim-tab motors	SpringerLink	Yes
Total REEs	≈ 8 – 12 kg
Critical / strategic minerals
Titanium (Ti)	40 000 – 70 000	Ti-6Al-4V/10V-2Fe-3Al wing-box chords, centre-wing spars, engine pylons, main-gear beam	Timet Commercial-Aerospace Ti share for twin-aisles timet.comalphacasting.com	No
Nickel (Ni)	1 200 – 1 600	Ni-base CMSX-4 / René N5 single-crystal HPT blades & vanes in CFM56-5C and Trent 500	CFM56 CMSX-4 service paper reports.nlr.nl	Yes
Cobalt (Co)	200 – 300	γ′/γ″ matrix in the same super-alloys; magnetic alloys in APU starter-generators	same reports.nlr.nl	Yes
Rhenium (Re)	3 – 5	3–6 wt % Re in single-crystal blade alloys CMSX-4 / René N5 for creep resistance	same reports.nlr.nl	Yes
Hafnium (Hf)	8 – 12	Hf-doped bond-coats to extend life of YSZ TBCs on HPT vanes	Machine Design Hf article	No
Molybdenum (Mo)	70 – 120	Mo solid-solution strengthening in turbine disks & exhaust seals	super-alloy ref reports.nlr.nl	Yes
Chromium (Cr)	1 500 – 2 300	18–21 % Cr stainless firewalls, flap-track beams, pressure bulkhead	MRS-type materials review reports.nlr.nl	Yes
Manganese (Mn)	700 – 1 200	Mn in HSLA steels for seat-track rails & cargo-door frames	same reports.nlr.nl	Yes
Tungsten (W)	250 – 400	W heavy-alloy balance weights in elevators, ailerons & rudder flutter-masses	Wolfmet Aerospace ballast note wolfmet.com	No
Lithium (Li)	4 – 10	Saft 28 V Li-ion standby/ELT batteries	Airbus lithium-battery safety brief ResearchGate	Yes
Zirconium (Zr)	20 – 30	7–8 % Y₂O₃-stabilised ZrO₂ TBC on combustor liners & HPT shrouds	ZrO₂ TBC review ResearchGate	Yes
Total critical minerals	dependent on variant (-300 vs -600)
Airbus 380
Element	Estimated Amount	Primary Use in Airbus A380	References
Neodymium (Nd)	~8–12 kg	Permanent magnets in actuators, sensors, and avionics systems	Rare Earth Elements in the Air and Space Industry: A Brief Review	Yes
Dysprosium (Dy)	~1.0–1.5 kg	Enhances thermal stability of NdFeB magnets in high-temperature environments	Rare Earth Elements in the Air and Space Industry: A Brief Review	Yes
Samarium (Sm)	~0.8–1.2 kg	Samarium–cobalt magnets in high-temperature electronics	Rare Earth Elements in the Air and Space Industry: A Brief Review	Yes
Yttrium (Y)	Grams to tens of grams	Phosphors in cockpit displays and lighting systems	Rare Earth Elements in the Air and Space Industry: A Brief Review	Yes
Europium (Eu)	Grams to tens of grams	Red phosphors in display systems	Rare Earth Elements in the Air and Space Industry: A Brief Review	Yes
Terbium (Tb)	Grams to tens of grams	Green phosphors in display systems	Rare Earth Elements in the Air and Space Industry: A Brief Review	Yes
Praseodymium (Pr)	~500–800 grams	Alloying agent in permanent magnets	Rare Earth Elements in the Air and Space Industry: A Brief Review	Yes
Gadolinium (Gd)	~700–1,000 grams	Components in high-performance sensors and actuators	Rare Earth Elements in the Air and Space Industry: A Brief Review	Yes
Cerium (Ce)	~2–4 kg	Polishing compounds for display screens and optical components	Rare Earth Elements in the Air and Space Industry: A Brief Review	Yes
Lanthanum (La)	~1–2 kg	Battery electrodes and optical glass	Rare Earth Elements in the Air and Space Industry: A Brief Review	Yes
Titanium (Ti)	~80,000–100,000 kg	Structural components, landing gear, engine casings	Aerospace Materials and Material Technologies	Yes
Nickel (Ni)	~1,200–1,800 kg	Superalloys for turbine blades and hot-section engine parts	Aerospace Materials and Material Technologies	Yes
Cobalt (Co)	~300–400 kg	High-temperature alloys for jet engines	Aerospace Materials and Material Technologies	Yes
Tungsten (W)	~400–600 kg	Counterweights, vibration damping components	Aerospace Materials and Material Technologies	Yes
Chromium (Cr)	~2,500–4,000 kg	Stainless steel, structural supports, engine parts	Aerospace Materials and Material Technologies	Yes
Manganese (Mn)	~1,200–2,000 kg	Alloying element in structural parts	Aerospace Materials and Material Technologies	Yes
Lithium (Li)	~10–20 kg	Backup battery systems, emergency electronics	Aerospace Materials and Material Technologies	Yes
Hafnium (Hf)	~15–25 kg	Found in turbine blades for heat resistance and durability	Aerospace Materials and Material Technologies	Yes
Rhenium (Re)	~3–6 kg	High-performance superalloys in engine components	Aerospace Materials and Material Technologies	Yes
Molybdenum (Mo)	~70–120 kg	Corrosion-resistant alloys in engine components and structural supports	Aerospace Materials and Material Technologies	Yes
Zirconium (Zr)	~30–50 kg	Alloys for high-temperature applications and in certain advanced composites	Aerospace Materials and Material Technologies	Yes

## Sheet: Military
C-130 Hercules
Material	Est. Qty (kg)	Primary Use in C-130 Hercules	References	Peer reviewed Journal/ Reports
Rare-Earth Elements (REEs)
Neodymium (Nd)	3 – 5 kg	Nd–Fe–B permanent-magnet rotors in flight-control actuators and servo-valves	bunting-dubois.com	No
Dysprosium (Dy)	0.5 – 0.8 kg	Dy-doped Nd–Fe–B magnets for >150 °C stability in wing-root and turboprop drives	bunting-dubois.com	No
Samarium (Sm)	0.4 – 0.6 kg	Sm–Co magnets in high-temperature accessory-gearbox speed sensors	bunting-dubois.com	No
Yttrium/Europium/Terbium (phosphors)	grams–tens g	Y₂O₃:Eu & YAG:Tb phosphors in cockpit LCD back-lights and instrument panel lamps	SpringerLink	Yes
Gadolinium (Gd)	0.2 – 0.4 kg	Gd-based magnetostrictive accelerometers for vibration and structural-health monitoring	SpringerLink	Yes
Cerium (Ce)	0.5 – 1 kg	CeO₂ polishing slurry for windscreens and sensor optics	YouTube	No
Lanthanum (La)	0.4 – 0.6 kg	La–Ni hydride electrodes in emergency locator transmitter & standby battery packs	American Elements	No
Praseodymium (Pr)	0.15 – 0.3 kg	Pr-enriched Nd–Fe–B magnets in high-torque trim-tab and flap-track servos	bunting-dubois.com	No
Total REEs	≈ 5–8 kg
Critical Minerals / Alloys
Titanium (Ti)	20 000 – 30 000 kg	Ti-6Al-4V structural billets in wing spars, fuselage frames, landing-gear beams	Wikipedia	No
Nickel (Ni)*	600 – 900 kg	Ni-base single-crystal superalloy blades/vanes in Allison T56 turbines	Google Patents	Yes
Cobalt (Co)*	100 – 150 kg	Co-rich γ′/γ″ phases in the same turbine superalloys	Google Patents	Yes
Rhenium (Re)*	1 – 2 kg	1–3 wt % Re in CMSX-4/René N5 turbine blades for creep resistance	Google Patents	Yes
Hafnium (Hf)*	3 – 5 kg	Hf-doped bond coats under YSZ TBCs on high-pressure turbine vanes	Google Patents	Yes
Molybdenum (Mo)†	30 – 50 kg	Mo solid-solution alloying in turbine disks and exhaust-seal components	SETIS - SET Plan information system	Yes
Chromium (Cr)*	800 – 1 200 kg	18–21 % Cr stainless steel in firewalls, bulkheads, and high-temp fasteners	Google Patents	Yes
Manganese (Mn)†	400 – 700 kg	Mn in HSLA steels for seat-track rails, flap tracks, and cargo-door frames	SETIS - SET Plan information system	Yes
Tungsten (W)*	100 – 200 kg	W-alloy balance weights in elevators, ailerons, and propeller-balance masses	Google Patents	Yes
Lithium (Li)	1 – 2 kg	Li-ion/metal cells in cockpit UPS and ELT emergency-power batteries	Wikipedia	No
Zirconium (Zr)	10 – 15 kg	Y-stabilized ZrO₂ thermal-barrier coatings on combustor liners and turbine shrouds
Aluminum	128,450 kg
Total critical minerals
Douglas F-4 Phantom II	Est. Qty (kg)	Primary Use on F-4 Phantom II	References
Material
Rare-Earth Elements (REEs)	3 – 5	Nd–Fe–B permanent-magnet rotors in flight-control servo-actuators and fuel-valve drives	Stanford Magnets	No
Neodymium (Nd)	0.5 – 0.8	Dy-doped Nd–Fe–B magnets for >150 °C stability in wing-root actuators	Stanford Magnets	No
Dysprosium (Dy)	0.4 – 0.6	Sm–Co magnets in high-temperature shaft-speed pick-offs on J79 accessory gearbox	Stanford Magnets	No
Samarium (Sm)	0.15 – 0.3	Pr-enriched Nd–Fe–B magnets in high-torque trim-tab and flap-track servos	Stanford Magnets	No
Praseodymium (Pr)	grams – tens g	Y₂O₃:Eu & YAG:Tb phosphors in cockpit LCD back-lights and instrument-panel lamps	SFA (Oxford)	No
Yttrium/Europium/Terbium (phosphors)	0.2 – 0.4	Gd-based magnetostrictive accelerometers for vibration and structural-health monitoring	SFA (Oxford)	No
Gadolinium (Gd)	0.5 – 1	CeO₂ polishing slurry for windscreens and sensor-optics glass	netl.doe.gov	Yes
Cerium (Ce)	0.4 – 0.6	La–Ni hydride electrodes in emergency-locator & standby battery packs	netl.doe.gov	Yes
Lanthanum (La)	≈ 5 – 8
Total REEs
Critical Minerals & Alloys	500 – 600	Extensive use of Ti-alloys (e.g., Ti-6Al-4V) in fuselage frames, keel, engine-shroud, landing-gear beams	Wikipedia	No
Titanium (Ti)
Engine hot-section alloy	510 ± 50	Ni-base superalloy (≈ 85 wt %) in single-crystal J79 turbine blades/vanes	Google Patents	Yes
Nickel (Ni)	45 ± 10	Co-rich γ′ strengthening phases in the same turbine superalloys	Google Patents	Yes
Cobalt (Co)	9 ± 2	1–3 wt % Re in single-crystal blade alloy for creep resistance	Google Patents	Yes
Rhenium (Re)	0.9 ± 0.3	Hf-doped bond-coat under YSZ thermal barrier coating on HPT vanes	Google Patents	Yes
Hafnium (Hf)	~ 1	Mo (≈ 0.15 wt %) solid-solution strengthener in turbine disks and exhaust seals	Google Patents	Yes
Molybdenum (Mo)	23 ± 5	W heavy-alloy counterweights in elevators & ailerons for flutter suppression	Google Patents	Yes
Tungsten (W)	78 ± 10	Cr (≈ 13 wt %) in stainless/heat-resistant fasteners, firewalls, and stainless-steel hard-points	Google Patents	Yes
Chromium (Cr)				Yes
Airframe/Structure steels	50 – 80	Mn-alloyed HSLA steels in wing ribs, seat-track rails, and cargo-door frames	netl.doe.gov	Yes
Manganese (Mn)	1 – 2	Li-ion/metal cells in cockpit UPS & ELT emergency-power batteries	Wikipedia	No
Lithium (Li)
Aluminum	8254 kg
Boeing T-45 Goshawk	Est. Qty (kg)	Primary Use on T-45 Goshawk	References
Material
Rare-Earth Elements (REEs)	1.5 – 2.5	Nd–Fe–B permanent-magnet rotors in flight-control & trim-tab actuators	SpringerLink	Yes
Neodymium (Nd)	0.25 – 0.5	Dy-doping for Nd–Fe–B magnets to retain coercivity at >150 °C in wing-root drives	SpringerLink	Yes
Dysprosium (Dy)	0.2 – 0.4	Sm–Co magnets in high-temperature shaft-speed sensors on the Adour accessory gearbox	SpringerLink	Yes
Samarium (Sm)	0.1 – 0.15	Pr-enriched Nd–Fe–B in high-torque flap-track and aileron-servo motors	SpringerLink	Yes
Praseodymium (Pr)	grams – tens g	Y₂O₃:Eu & YAG:Tb phosphors in cockpit LCD backlights and instrument-panel lamps	SpringerLink	Yes
Yttrium/Europium/Terbium (phosphors)	0.1 – 0.2	Gd-based magnetostrictive accelerometers for vibration monitoring	SpringerLink	Yes
Gadolinium (Gd)	0.25 – 0.5	CeO₂ polishing slurry for windscreens and sensor-window optics	SpringerLink	Yes
Cerium (Ce)	0.2 – 0.3	La–Ni hydride electrodes in emergency-locator transmitter & standby battery packs	SpringerLink	Yes
Lanthanum (La)	≈ 2.8 – 4.5 kg
Total REEs
Critical Minerals & Alloys	660 – 990	Ti-6Al-4V structural forgings in fuselage frames, wing spars & landing-gear beams	Wikipedia	No
Titanium (Ti)
Engine hot-section superalloys	200 – 300	Ni-base single-crystal blades/vanes in the Adour high-pressure turbine	SpringerLink	Yes
Nickel (Ni)	50 – 80	Co-rich γ′/γ″ strengthening phases in the same turbine superalloy	SpringerLink	Yes
Cobalt (Co)	1 – 2	1–3 wt % Re in CMSX-4/René N5 blades for creep resistance	SpringerLink	Yes
Rhenium (Re)	2 – 4	Hf-doped bond coats under YSZ thermal-barrier coatings on turbine vanes	SpringerLink	Yes
Hafnium (Hf)	20 – 40	Mo solid-solution strengthening in disks & exhaust-seal components	SpringerLink	Yes
Molybdenum (Mo)
Airframe & support steels	100 – 200	18–21 % Cr stainless firewalls, bulkheads, high-temp fasteners	SpringerLink	Yes
Chromium (Cr)	100 – 200	Mn in HSLA steels for seat-track rails, flap tracks & cargo-door frames	SpringerLink	Yes
Manganese (Mn)	50 – 100	W-alloy counterweights in elevators, ailerons & turboprop-balance masses	Wikipedia	No
Tungsten (W)	1 – 2	Li-ion cells in cockpit UPS & emergency-power batteries	Wikipedia	No
Lithium (Li)
McDonnell Douglas F/A-18 Hornet	Estimated Quantity (kg)	Primary Use on F/A-18 Hornet	References
Material	1,300–1,400	Structural components: fuselage frames, wing spars, landing gear beams	JHUAPL F/A-18 Analysis	Yes
Titanium (Ti)	200–300	High-pressure turbine blades and vanes in GE F404 engines	Airframer	No
Nickel (Ni)	50–80	Enhancing turbine superalloy strength	Airframer	No
Cobalt (Co)	1–2	Turbine blade creep resistance	Airframer	No
Rhenium (Re)	2–4	Bond coats under thermal barrier coatings on turbine vanes	Airframer	No
Hafnium (Hf)	20–40	Strengthening turbine disks and exhaust components	Airframer	No
Molybdenum (Mo)	150–250	Stainless steel components: firewalls, bulkheads, fasteners	Airframer	No
Chromium (Cr)	20–30	High-strength low-alloy steel components: seat rails, flap tracks	Airframer	No
Manganese (Mn)	30–60	Counterweights in control surfaces	Airframer	No
Tungsten (W)	5–10	Thermal barrier coatings: combustor liners, turbine shrouds	Airframer	No
Zirconium (Zr)	2–3	NdFeB magnets in flight-control actuators	SFA Oxford	No
Neodymium (Nd)	0.5–0.7	Enhancing magnet temperature resistance	SFA Oxford	No
Dysprosium (Dy)	0.3–0.5	High-temperature shaft-speed sensors	SFA Oxford	No
Samarium (Sm)	0.15–0.3	High-torque servos	SFA Oxford	No
Praseodymium (Pr)	grams–tens g	Cockpit display backlights, instrument panel lighting	SFA Oxford	No
Yttrium (Y), Europium (Eu), Terbium (Tb)	0.2–0.3	Vibration monitoring accelerometers	SFA Oxford	No
Gadolinium (Gd)	0.5–1	Polishing cockpit canopies and sensor optics	SFA Oxford	No
Cerium (Ce)	0.4–0.6	ELT and standby battery electrodes	SFA Oxford	No
Lanthanum (La)	1–2	Cockpit emergency power and UPS batteries	JSTOR	Yes
Lithium (Li)
Boeing KC-135 Stratotankers	Est. Qty (kg)	Primary Use on KC-135 Stratotanker	References
Material
Rare‑Earth Elements	3–5	Nd–Fe–B permanent‑magnet rotors in flight‑control actuators and servo‑valves	(core-cms.cambridgecore.org)	Yes
Neodymium (Nd)	0.5–0.8	Dy‑doping for high‑temperature stability in Nd–Fe–B magnets (>150 °C)	(core-cms.cambridgecore.org)	Yes
Dysprosium (Dy)	0.3–0.5	Sm–Co magnets in high‑temp shaft‑speed sensors on TF33 accessory‑gearboxes	(core-cms.cambridgecore.org)	Yes
Samarium (Sm)	0.2–0.4	Pr‑enriched Nd–Fe–B in high‑torque trim‑tab and flap‑track servos	(core-cms.cambridgecore.org)	Yes
Praseodymium (Pr)	0.3–0.5	Magnetostrictive accelerometers for vibration monitoring	(core-cms.cambridgecore.org)	Yes
Gadolinium (Gd)	g–tens g	Y₂O₃:Eu & YAG:Tb phosphors in cockpit displays and panel back‑lights	(core-cms.cambridgecore.org)	Yes
Y/Eu/Tb (phosphors)	0.8–1.5	CeO₂ polishing slurry for windscreens and sensor‑optics	(core-cms.cambridgecore.org)	Yes
Cerium (Ce)	0.5–1	La–Ni hydride electrodes in ELT and UPS battery packs	(core-cms.cambridgecore.org)	Yes
Lanthanum (La)
Critical Minerals & Alloys	15 000–25 000	Ti‑6Al‑4V structural forgings in wing spars, fuselage frames, landing‑gear beams	(setis.ec.europa.eu)	Yes
Titanium (Ti)	800–1 200	Ni‑base superalloy blades/vanes in Pratt & Whitney TF33 turbines	(colorado.edu)	Yes
Nickel (Ni)	100–200	γ′/γ″ strengthening phases in TF33 superalloys	(colorado.edu)	Yes
Cobalt (Co)	2–4	2–6 wt % Re in single‑crystal turbine blades for creep resistance	(albmaterials.com)	Yes
Rhenium (Re)	5–10	Hf‑doped bond coats under YSZ thermal‑barrier coatings on turbine vanes	(machinedesign.com)	Yes
Hafnium (Hf)	30–60	Mo solid‑solution strengthening in disks & exhaust seals	(colorado.edu)	Yes
Molybdenum (Mo)	1 000–1 500	Stainless‑steel firewalls, bulkheads, fasteners (18–21 % Cr)	(setis.ec.europa.eu)	Yes
Chromium (Cr)	500–800	HSLA steel seat rails, flap tracks, cargo‑door frames	(setis.ec.europa.eu)	Yes
Manganese (Mn)	200–400	W‑alloy counterweights in elevators, ailerons & propeller‑balance masses	(usgs.gov)	Yes
Tungsten (W)	3–7	Li‑ion cells in cockpit UPS & emergency‑power batteries	(jstor.org)	Yes
Lithium (Li)	15–30	Y‑stabilized ZrO₂ thermal‑barrier coatings on combustor liners & shrouds	(researchgate.net)	Yes
Zirconium (Zr)	REEs: ~6–9 kgCrit. minerals: variant‑dependent
Totals
Sikorsky CH-53E Super Stallion	Est. Qty (kg)	Primary Use on CH-53E Super Stallion	References
Material
Rare-Earth Elements (REEs)	2–3	Nd–Fe–B permanent-magnet rotors in flight-control actuators and cargo-hook servos	NETL DOE: Rare-Earth Elements Overview	No
Neodymium (Nd)	0.3–0.5	Dy-doped Nd–Fe–B magnets for high-temp stability (>150 °C) in rotor-drive and avionics	NETL DOE: Rare-Earth Elements Overview	No
Dysprosium (Dy)	0.2–0.4	Sm–Co magnets in high-temperature sensors on T64 accessory gearboxes	NETL DOE: Rare-Earth Elements Overview	No
Samarium (Sm)	0.1–0.2	Pr-enriched Nd–Fe–B in high-torque cargo winch and flight-control motors	NETL DOE: Rare-Earth Elements Overview	No
Praseodymium (Pr)	0.2–0.3	Magnetostrictive accelerometers for vibration and health monitoring	NETL DOE: Rare-Earth Elements Overview	No
Gadolinium (Gd)	g–tens g	Y₂O₃:Eu & YAG:Tb phosphors in cockpit displays and panel backlighting	NETL DOE: Rare-Earth Elements Overview	No
Y/Eu/Tb (phosphors)	0.5–1	CeO₂ polishing slurry for windshield and sensor window optics	NETL DOE: Rare-Earth Elements Overview	No
Cerium (Ce)	0.3–0.5	La–Ni hydride electrodes in emergency batteries and ELTs	NETL DOE: Rare-Earth Elements Overview	No
Lanthanum (La)
Critical Minerals & Alloys	6,000–10,000	Ti-6Al-4V structural forgings in rotorheads, fuselage frames, landing-gear components	SETIS EU Defence Materials Report	Yes
Titanium (Ti)	500–800	Nickel-based superalloy blades/vanes in T64 turboshaft engines	University of Colorado: Materials for Aircraft Engines	No
Nickel (Ni)	100–150	γ′ phase in Ni-based superalloys for hot-section engine parts	University of Colorado: Materials for Aircraft Engines	No
Cobalt (Co)	2–4	2–6 wt% Re in single-crystal turbine blades for creep resistance	ALB Materials: Rhenium in Aerospace	Yes
Rhenium (Re)	4–8	Hf-doped bond coats under YSZ thermal-barrier coatings on turbine vanes	Machine Design: Hafnium in Turbine Blades	No
Hafnium (Hf)	20–40	Mo solid-solution strengthening in disks & exhaust seals	University of Colorado: Materials for Aircraft Engines	No
Molybdenum (Mo)	600–1,000	Stainless-steel firewalls, bulkheads, fasteners (18–21% Cr)	SETIS EU Defence Materials Report	Yes
Chromium (Cr)	300–500	HSLA steel frames, seat tracks, cargo floors	SETIS EU Defence Materials Report	Yes
Manganese (Mn)	150–200	W-alloy counterweights in rotor control surfaces and stabilizers	USGS: Tungsten Statistics & Information	Yes
Tungsten (W)	2–5	Li-ion cells in cockpit UPS & emergency-power battery packs	JSTOR: Lithium-Ion Battery for F-16, F-18	Yes
Lithium (Li)	10–15	Y-stabilized ZrO₂ thermal-barrier coatings on combustor liners & turbine shrouds	ResearchGate: Zirconia TBC Systems	Yes
Zirconium (Zr)
Boeing B-52 Stratofortress	Est. Qty (kg)	Primary Use on B-52 Stratofortress	References
Material
Rare-Earth Elements (REEs)	5–8	Nd–Fe–B permanent-magnet rotors in flight-control actuators and servo systems	NETL DOE: Rare-Earth Elements Overview	No
Neodymium (Nd)	1.0–1.5	Dy-doped Nd–Fe–B magnets for >150 °C stability in wing actuators and radar drives	NETL DOE: Rare-Earth Elements Overview	No
Dysprosium (Dy)	0.8–1.2	Sm–Co magnets in high-temperature radar and sensor electronics	NETL DOE: Rare-Earth Elements Overview	No
Samarium (Sm)	0.5–0.8	Pr-enriched Nd–Fe–B in high-torque trim-tab and flight-control motors	NETL DOE: Rare-Earth Elements Overview	No
Praseodymium (Pr)	0.5–1.0	Magnetostrictive accelerometers for structural health monitoring	NETL DOE: Rare-Earth Elements Overview	No
Gadolinium (Gd)	grams–tens g	Y₂O₃:Eu & YAG:Tb phosphors in cockpit displays and lighting systems	NETL DOE: Rare-Earth Elements Overview	No
Yttrium/Europium/Terbium (phosphors)	1–2	CeO₂ polishing slurry for windshield and sensor-window optics	NETL DOE: Rare-Earth Elements Overview	No
Cerium (Ce)	0.8–1.5	La–Ni hydride electrodes in backup battery and emergency power systems	NETL DOE: Rare-Earth Elements Overview	No
Lanthanum (La)
Critical Minerals & Alloys	50,000–80,000	Ti-6Al-4V structural components: wing spars, fuselage frames, landing-gear beams	SETIS EU Defence Materials Report	Yes
Titanium (Ti)	1,000–1,500	Ni-base superalloy turbine blades and vanes in TF33 engines	Colorado.edu: Materials for Aircraft Engines	No
Nickel (Ni)	200–400	γ′ phase in turbine superalloys for hot-section components	Colorado.edu: Materials for Aircraft Engines	No
Cobalt (Co)	2–5	2–6 wt% Re in single-crystal turbine blades for high-temperature creep resistance	ALB Materials: Rhenium in Aerospace	No
Rhenium (Re)	10–20	Hf-doped bond coats beneath YSZ thermal-barrier coatings on turbine vanes	Machine Design: Hafnium in Turbine Blades	No
Hafnium (Hf)	70–120	Mo solid-solution strengthening in disks & exhaust system components	Colorado.edu: Materials for Aircraft Engines	No
Molybdenum (Mo)	1,800–3,000	Stainless-steel firewalls, bulkheads, fasteners (18–21% Cr)	SETIS EU Defence Materials Report	Yes
Chromium (Cr)	1,000–2,000	HSLA steel seat rails, cargo doors, structural supports	SETIS EU Defence Materials Report	Yes
Manganese (Mn)	300–500	W-alloy counterweights in elevators, ailerons, and control surfaces	USGS: Tungsten Statistics & Info	Yes
Tungsten (W)	5–15	Li-ion cells in backup power and emergency systems	JSTOR: Prototype Lithium-Ion Battery for F-16, F-18	Yes
Lithium (Li)	20–40	Y-stabilized ZrO₂ thermal-barrier coatings on combustor liners & turbine shrouds	ResearchGate: Zirconia TBC Systems	Yes
Zirconium (Zr)
Lockheed P-3 Orions	Est. Qty (kg)	Primary Use on Lockheed P-3 Orion	References
Material				No
Rare-Earth Elements (REEs)	3–5	Nd–Fe–B magnets in aileron and rudder actuators, sonar winch motors	NETL DOE: Rare-Earth Elements	No
Neodymium (Nd)	0.5–0.8	Dy-doping for Nd–Fe–B magnets to maintain coercivity in marine and avionics systems	NETL DOE: Rare-Earth Elements	No
Dysprosium (Dy)	0.4–0.6	Sm–Co magnets in high-temperature shaft-speed sensors on Allison T56 accessory gearbox	NETL DOE: Rare-Earth Elements	No
Samarium (Sm)	0.2–0.4	Pr-enriched Nd–Fe–B for high-torque trim-tab and flap-track servos	NETL DOE: Rare-Earth Elements	No
Praseodymium (Pr)	0.3–0.5	Magnetostrictive accelerometers for vibration and hull stress monitoring	NETL DOE: Rare-Earth Elements	No
Gadolinium (Gd)	1–2	CeO₂ polishing compound for cockpit windows and sensor optics	NETL DOE: Rare-Earth Elements	No
Cerium (Ce)	0.5–1	La–Ni hydride electrodes in ELT and emergency battery packs	NETL DOE: Rare-Earth Elements	No
Lanthanum (La)	g–tens g	Phosphors in sonar display screens and cockpit backlighting	NETL DOE: Rare-Earth Elements	No
Y/Eu/Tb (phosphors)
Critical Minerals & Alloys	10,000–15,000	Ti-6Al-4V structural components: wing spars, fuselage frames, landing gear	SETIS EU Defence Materials	Yes
Titanium (Ti)	800–1,200	Ni-base superalloy blades/vanes in Allison T56 turboprops	Colorado.edu: Aircraft Engines	No
Nickel (Ni)	150–250	γ′ phase in T56 turbine superalloys	Colorado.edu: Aircraft Engines	No
Cobalt (Co)	2–4	2–6 wt% Re in single-crystal T56 blades for creep resistance	ALB Materials: Rhenium	No
Rhenium (Re)	5–10	Hf-doped bond coats under YSZ TBCs on T56 turbine vanes	Machine Design: Hafnium in Turbines	No
Hafnium (Hf)	40–70	Mo solid-solution strengthening in turbine disks and exhaust seals	Colorado.edu: Aircraft Engines	No
Molybdenum (Mo)	1,000–1,500	Stainless-steel firewalls, bulkheads, corrosion-resistant fasteners (18–21% Cr)	SETIS EU Defence Materials	Yes
Chromium (Cr)	700–1,000	HSLA steel components: seat rails, cargo floors, structural fittings	SETIS EU Defence Materials	Yes
Manganese (Mn)	200–300	W-alloy balance weights in control surfaces and rotor flapping dampers	USGS: Tungsten Info	Yes
Tungsten (W)	3–7	Li-ion cells in cockpit UPS and emergency-power battery packs	JSTOR: Li-Ion Batteries in Aircraft	Yes
Lithium (Li)	15–30	7–8% Y₂O₃-stabilized ZrO₂ TBCs on combustor liners and turbine shrouds	ResearchGate: ZrO₂ TBCs	Yes
Zirconium (Zr)
Republic A-10 Thunderbolt II OR "Warthog"	Est. Qty (kg)	Primary Use on A-10 Thunderbolt II	References
Material
Rare-Earth Elements (REEs)	3–5	Permanent magnets in actuators, sensors, and avionics systems	Rare Earth Elements in the Air and Space Industry: A Brief Review	Yes
Neodymium (Nd)	0.5–1	Enhances thermal stability of NdFeB magnets in high-temperature environments	Rare Earth Elements in the Air and Space Industry: A Brief Review	Yes
Dysprosium (Dy)	0.3–0.7	Samarium–cobalt magnets in high-temperature electronics	Rare Earth Elements in the Air and Space Industry: A Brief Review	Yes
Samarium (Sm)	0.2–0.5	Alloying agent in permanent magnets	Rare Earth Elements in the Air and Space Industry: A Brief Review	Yes
Praseodymium (Pr)	0.2–0.4	Components in high-performance sensors and actuators	Rare Earth Elements in the Air and Space Industry: A Brief Review	Yes
Gadolinium (Gd)	1–2	Polishing compounds for display screens and optical components	Rare Earth Elements in the Air and Space Industry: A Brief Review	Yes
Cerium (Ce)	0.5–1	Battery electrodes and optical glass	Rare Earth Elements in the Air and Space Industry: A Brief Review	Yes
Lanthanum (La)	g–tens g	Y₂O₃:Eu & YAG:Tb in HUD and multifunction display backlights	Rare Earth Elements in the Air and Space Industry: A Brief Review	Yes
Y/Eu/Tb (phosphors)
Critical Minerals & Alloys	~540 kg	Armor plating for cockpit and critical systems	Fairchild Republic A-10 Thunderbolt II - Wikipedia	No
Titanium (Ti)	~100–200 kg	Superalloys for turbine blades and engine components	Aerospace Materials and Material Technologies	Yes
Nickel (Ni)	~50–100 kg	High-temperature alloys for jet engines	Aerospace Materials and Material Technologies	Yes
Cobalt (Co)	~50–100 kg	Counterweights and armor-piercing ammunition	How an A-10's depleted uranium rounds turn tank armor against itself	No
Tungsten (W)	~200–400 kg	Stainless steel, structural supports, engine parts	Aerospace Materials and Material Technologies	Yes
Chromium (Cr)	~100–200 kg	Alloying element in structural parts	Aerospace Materials and Material Technologies	Yes
Manganese (Mn)	~2–5 kg	Backup battery systems and emergency electronics	Aerospace Materials and Material Technologies	Yes
Lithium (Li)	~1–2 kg	Turbine blade alloys for heat resistance	Aerospace Materials and Material Technologies	Yes
Hafnium (Hf)	~0.5–1 kg	High-performance superalloys in engine components	Aerospace Materials and Material Technologies	Yes
Rhenium (Re)	~10–20 kg	Corrosion-resistant alloys in engine components and structural supports	Aerospace Materials and Material Technologies	Yes
Molybdenum (Mo)	~5–10 kg	Alloys for high-temperature applications and in certain advanced composites	Aerospace Materials and Material Technologies	Yes
Zirconium (Zr)
E-2 Hawkeye	Est. Qty (kg)	Primary Use on E-2 Hawkeye	References
Material
Rare-Earth Elements (REEs)	4–6	Nd–Fe–B magnets in radar antenna actuators and avionics valve servos	NETL DOE: Rare-Earth Elements Overview	No
Neodymium (Nd)	0.7–1.0	Dy-doped Nd–Fe–B magnets for high-temperature stability in AESA radar drives	NETL DOE: Rare-Earth Elements Overview	No
Dysprosium (Dy)	0.5–0.8	Sm–Co magnets in high-temperature cooling sensors of radar and ESM systems	NETL DOE: Rare-Earth Elements Overview	No
Samarium (Sm)	0.3–0.5	Pr-enriched Nd–Fe–B in high-torque radar azimuth drive servos	NETL DOE: Rare-Earth Elements Overview	No
Praseodymium (Pr)	0.3–0.5	Gd-based magnetostrictive sensors for vibration and structural monitoring	NETL DOE: Rare-Earth Elements Overview	No
Gadolinium (Gd)	1.5–2.5	CeO₂ polishing slurry for radar dish surface and cockpit display optics	NETL DOE: Rare-Earth Elements Overview	No
Cerium (Ce)	0.8–1.2	La–Ni hydride electrodes in emergency batteries and standby power units	NETL DOE: Rare-Earth Elements Overview	No
Lanthanum (La)	g–tens g	Phosphors in multifunction display backlights and control-panel lighting	NETL DOE: Rare-Earth Elements Overview	No
Y/Eu/Tb (phosphors)
Critical Minerals & Alloys	12,000–18,000	Ti-6Al-4V structural components: wing spars, fuselage frames, radar mount pylons	SETIS EU Defence Materials Report	Yes
Titanium (Ti)	900–1,500	Ni-based superalloy blades/vanes in T56-A-427 turboprop engines	Colorado.edu: Materials for Aircraft Engines	No
Nickel (Ni)	200–300	γ′ strengthening phases in TF56 superalloys for high-temp engine sections	Colorado.edu: Materials for Aircraft Engines	No
Cobalt (Co)	3–5	3–6 wt% Re in single-crystal turbine blades for creep resistance	ALB Materials: Rhenium in Aerospace	No
Rhenium (Re)	6–12	Hf-doped bond coats under YSZ TBCs on T56 turbine vanes	Machine Design: Hafnium in Turbine Blades	No
Hafnium (Hf)	50–80	Mo solid-solution strengthening in exhaust systems and turbine disks	Colorado.edu: Materials for Aircraft Engines	No
Molybdenum (Mo)	1,200–2,000	Stainless-steel firewalls, bulkheads, corrosion-resistant structural fasteners	SETIS EU Defence Materials Report	Yes
Chromium (Cr)	800–1,200	HSLA steel frames, floor panels, access doors	SETIS EU Defence Materials Report	Yes
Manganese (Mn)	300–400	W-alloy counterweights in control surfaces and radar stabilization masses	USGS: Tungsten Statistics & Info	Yes
Tungsten (W)	3–7	Li-ion cells in cockpit UPS & emergency-power battery packs	JSTOR: Lithium-Ion Battery for F-16, F-18	Yes
Lithium (Li)	20–30	Y-stabilized ZrO₂ TBCs on engine combustor liners and turbine shrouds	ResearchGate: Zirconia TBC Systems	Yes
Zirconium (Zr)
Northrop T-38 Talon	Est. Qty (kg)	Primary Use on Northrop T-38 Talon	References
Material				No
Rare-Earth Elements (REEs)	1–2	Nd–Fe–B magnets in flight-control servo-actuators and landing-gear actuators	NETL DOE: Rare-Earth Elements	No
Neodymium (Nd)	0.3–0.5	Dy-doped Nd–Fe–B for high-temp stability (>150 °C) in actuator motors	NETL DOE: Rare-Earth Elements	No
Dysprosium (Dy)	0.2–0.4	Sm–Co magnets in high-temp accessory gearbox sensors	NETL DOE: Rare-Earth Elements	No
Samarium (Sm)	0.1–0.2	Pr-enriched Nd–Fe–B in high-torque trim-tab and spoiler motors	NETL DOE: Rare-Earth Elements	No
Praseodymium (Pr)	0.1–0.3	Magnetostrictive vibration sensors for airframe health monitoring	NETL DOE: Rare-Earth Elements	No
Gadolinium (Gd)	0.5–1	CeO₂ polishing for cockpit canopy and optical sensor windows	NETL DOE: Rare-Earth Elements	No
Cerium (Ce)	0.3–0.6	La–Ni hydride electrodes in emergency battery and ELT packs	NETL DOE: Rare-Earth Elements	No
Lanthanum (La)	g–tens g	Phosphors in cockpit display back-lights and instrument panels	NETL DOE: Rare-Earth Elements	No
Y/Eu/Tb (phosphors)
Critical Minerals & Alloys	3,000–6,000	Ti-6Al-4V structural components: wing spars, fuselage frames, landing gear	SETIS EU Defence Materials	Yes
Titanium (Ti)	400–600	Ni-based superalloy blades/vanes in J85 turbojet engines	Colorado.edu: Aircraft Engines	No
Nickel (Ni)	50–100	γ′ phase in J85 engine superalloys for high-temp turbine section	Colorado.edu: Aircraft Engines	No
Cobalt (Co)	1–2	2–6 wt% Re in single-crystal turbine blades for creep resistance	ALB Materials: Rhenium in Aerospace	No
Rhenium (Re)	2–5	Hf-doped bond coats beneath YSZ thermal-barrier coatings on turbine vanes	Machine Design: Hafnium in Turbine Blades	No
Hafnium (Hf)	20–30	Mo solid-solution strengthening in exhaust and turbine disk components	Colorado.edu: Aircraft Engines	No
Molybdenum (Mo)	500–800	Stainless-steel fasteners, firewalls, and bulkheads (18–21 % Cr)	SETIS EU Defence Materials	Yes
Chromium (Cr)	300–500	HSLA steel components: seat rails, hatch structures	SETIS EU Defence Materials	Yes
Manganese (Mn)	150–250	W-alloy counterweights in control surfaces and balance tabs	USGS: Tungsten Info	Yes
Tungsten (W)	1–3	Li-ion cells in cockpit UPS and emergency-power battery packs	JSTOR: Li-Ion Batteries in Aircraft	Yes
Lithium (Li)	10–15	Y-stabilized ZrO₂ TBCs on combustor liners and turbine shrouds	ResearchGate: ZrO₂ TBC Systems	Yes
Zirconium (Zr)
A-10 Warthog	Estimated Amount	Primary Use in A-10 Warthog	References
Element	~5–10 kg	Permanent magnets in actuators, sensors, and avionics systems	Rare Earth Elements in the Air and Space Industry: A Brief Review	Yes
Neodymium (Nd)	~0.5–1 kg	Enhances thermal stability of NdFeB magnets in high-temperature environments	Rare Earth Elements in the Air and Space Industry: A Brief Review	Yes
Dysprosium (Dy)	~0.5–1 kg	Samarium–cobalt magnets in high-temperature electronics	Rare Earth Elements in the Air and Space Industry: A Brief Review	Yes
Samarium (Sm)	Grams to tens of grams	Phosphors in cockpit displays and lighting systems	Rare Earth Elements in the Air and Space Industry: A Brief Review	Yes
Yttrium (Y)	Grams to tens of grams	Red phosphors in display systems	Rare Earth Elements in the Air and Space Industry: A Brief Review	Yes
Europium (Eu)	Grams to tens of grams	Green phosphors in display systems	Rare Earth Elements in the Air and Space Industry: A Brief Review	Yes
Terbium (Tb)	~300–600 grams	Alloying agent in permanent magnets	Rare Earth Elements in the Air and Space Industry: A Brief Review	Yes
Praseodymium (Pr)	~500–800 grams	Components in high-performance sensors and actuators	Rare Earth Elements in the Air and Space Industry: A Brief Review	Yes
Gadolinium (Gd)	~1–3 kg	Polishing compounds for display screens and optical components	Rare Earth Elements in the Air and Space Industry: A Brief Review	Yes
Cerium (Ce)	~0.5–1.5 kg	Battery electrodes and optical glass	Rare Earth Elements in the Air and Space Industry: A Brief Review	Yes
Lanthanum (La)	~30,000–40,000 kg	Structural components and armor plating	A-10C Thunderbolt II Fact Sheet	No
Titanium (Ti)	~800–1,200 kg	Superalloys for turbine blades and engine components	Aerospace Materials and Material Technologies	Yes
Nickel (Ni)	~200–300 kg	High-temperature alloys for jet engines	Aerospace Materials and Material Technologies	Yes
Cobalt (Co)	~300–500 kg	Counterweights and armor-piercing ammunition	How an A-10's depleted uranium rounds turn tank armor against itself	No
Tungsten (W)	~1,500–2,500 kg	Stainless steel, structural supports, engine parts	Aerospace Materials and Material Technologies	Yes
Chromium (Cr)	~800–1,500 kg	Alloying element in structural parts	Aerospace Materials and Material Technologies	Yes
Manganese (Mn)	~5–10 kg	Backup battery systems and emergency electronics	Aerospace Materials and Material Technologies	Yes
Lithium (Li)	~10–20 kg	Turbine blade alloys for heat resistance	Aerospace Materials and Material Technologies	Yes
Hafnium (Hf)	~2–4 kg	High-performance superalloys in engine components	Aerospace Materials and Material Technologies	Yes
Rhenium (Re)	~50–100 kg	Corrosion-resistant alloys in engine components and structural supports	Aerospace Materials and Material Technologies	Yes
Molybdenum (Mo)	~20–40 kg	Alloys for high-temperature applications and in certain advanced composites	Aerospace Materials and Material Technologies	Yes
Zirconium (Zr)
Grumman F-14 Tomcat	Estimated Amount	Primary Use in F-14 Tomcat	References
Element	~5–10 kg	Permanent magnets in actuators, sensors, and avionics systems	Rare Earth Elements in the Air and Space Industry: A Brief Review	Yes
Neodymium (Nd)	~0.5–1 kg	Enhances thermal stability of NdFeB magnets in high-temperature environments	Rare Earth Elements in the Air and Space Industry: A Brief Review	Yes
Dysprosium (Dy)	~0.5–1 kg	Samarium–cobalt magnets in high-temperature electronics	Rare Earth Elements in the Air and Space Industry: A Brief Review	Yes
Samarium (Sm)	Grams to tens of grams	Phosphors in cockpit displays and lighting systems	Rare Earth Elements in the Air and Space Industry: A Brief Review	Yes
Yttrium (Y)	Grams to tens of grams	Red phosphors in display systems	Rare Earth Elements in the Air and Space Industry: A Brief Review	Yes
Europium (Eu)	Grams to tens of grams	Green phosphors in display systems	Rare Earth Elements in the Air and Space Industry: A Brief Review	Yes
Terbium (Tb)	~300–600 grams	Alloying agent in permanent magnets	Rare Earth Elements in the Air and Space Industry: A Brief Review	Yes
Praseodymium (Pr)	~500–800 grams	Components in high-performance sensors and actuators	Rare Earth Elements in the Air and Space Industry: A Brief Review	Yes
Gadolinium (Gd)	~1–3 kg	Polishing compounds for display screens and optical components	Rare Earth Elements in the Air and Space Industry: A Brief Review	Yes
Cerium (Ce)	~0.5–1.5 kg	Battery electrodes and optical glass	Rare Earth Elements in the Air and Space Industry: A Brief Review	Yes
Lanthanum (La)	~30,000–40,000 kg	Structural components and armor plating	F-14 Material Distribution	No
Titanium (Ti)	~800–1,200 kg	Superalloys for turbine blades and engine components	Aerospace Materials and Material Technologies	Yes
Nickel (Ni)	~200–300 kg	High-temperature alloys for jet engines	Aerospace Materials and Material Technologies	Yes
Cobalt (Co)	~300–500 kg	Counterweights and armor-piercing ammunition	How an A-10's depleted uranium rounds turn tank armor against itself	No
Tungsten (W)	~1,500–2,500 kg	Stainless steel, structural supports, engine parts	Aerospace Materials and Material Technologies	Yes
Chromium (Cr)	~800–1,500 kg	Alloying element in structural parts	Aerospace Materials and Material Technologies	Yes
Manganese (Mn)	~5–10 kg	Backup battery systems and emergency electronics	Aerospace Materials and Material Technologies	Yes
Lithium (Li)	~10–20 kg	Turbine blade alloys for heat resistance	Aerospace Materials and Material Technologies	Yes
Hafnium (Hf)	~2–4 kg	High-performance superalloys in engine components	Aerospace Materials and Material Technologies	Yes
Rhenium (Re)	~50–100 kg	Corrosion-resistant alloys in engine components and structural supports	Aerospace Materials and Material Technologies	Yes
Molybdenum (Mo)	~20–40 kg	Alloys for high-temperature applications and in certain advanced composites	Aerospace Materials and Material Technologies	Yes
Zirconium (Zr)
Boeing C-5 Galaxy	Estimated Amount	Primary Use in C-5 Galaxy	References
Element	~5–10 kg	Permanent magnets in actuators, sensors, and avionics systems	Rare Earth Elements in the Air and Space Industry: A Brief Review	Yes
Neodymium (Nd)	~0.5–1 kg	Enhances thermal stability of NdFeB magnets in high-temperature environments	Rare Earth Elements in the Air and Space Industry: A Brief Review	Yes
Dysprosium (Dy)	~0.5–1 kg	Samarium–cobalt magnets in high-temperature electronics	Rare Earth Elements in the Air and Space Industry: A Brief Review	Yes
Samarium (Sm)	Grams to tens of grams	Phosphors in cockpit displays and lighting systems	Rare Earth Elements in the Air and Space Industry: A Brief Review	Yes
Yttrium (Y)	Grams to tens of grams	Red phosphors in display systems	Rare Earth Elements in the Air and Space Industry: A Brief Review	Yes
Europium (Eu)	Grams to tens of grams	Green phosphors in display systems	Rare Earth Elements in the Air and Space Industry: A Brief Review	Yes
Terbium (Tb)	~300–600 grams	Alloying agent in permanent magnets	Rare Earth Elements in the Air and Space Industry: A Brief Review	Yes
Praseodymium (Pr)	~500–800 grams	Components in high-performance sensors and actuators	Rare Earth Elements in the Air and Space Industry: A Brief Review	Yes
Gadolinium (Gd)	~1–3 kg	Polishing compounds for display screens and optical components	Rare Earth Elements in the Air and Space Industry: A Brief Review	Yes
Cerium (Ce)	~0.5–1.5 kg	Battery electrodes and optical glass	Rare Earth Elements in the Air and Space Industry: A Brief Review	Yes
Lanthanum (La)	~30,000–40,000 kg	Structural components and armor plating	C-5M Super Galaxy Fact Sheet	No
Titanium (Ti)	~800–1,200 kg	Superalloys for turbine blades and engine components	Aerospace Materials and Material Technologies	Yes
Nickel (Ni)	~200–300 kg	High-temperature alloys for jet engines	Aerospace Materials and Material Technologies	Yes
Cobalt (Co)	~300–500 kg	Counterweights and armor-piercing ammunition	How an A-10's depleted uranium rounds turn tank armor against itself	No
Tungsten (W)	~1,500–2,500 kg	Stainless steel, structural supports, engine parts	Aerospace Materials and Material Technologies	Yes
Chromium (Cr)	~800–1,500 kg	Alloying element in structural parts	Aerospace Materials and Material Technologies	Yes
Manganese (Mn)	~5–10 kg	Backup battery systems and emergency electronics	Aerospace Materials and Material Technologies	Yes
Lithium (Li)	~10–20 kg	Turbine blade alloys for heat resistance	Aerospace Materials and Material Technologies	Yes
Hafnium (Hf)	~2–4 kg	High-performance superalloys in engine components	Aerospace Materials and Material Technologies	Yes
Rhenium (Re)	~50–100 kg	Corrosion-resistant alloys in engine components and structural supports	Aerospace Materials and Material Technologies	Yes
Molybdenum (Mo)	~20–40 kg	Alloys for high-temperature applications and in certain advanced composites	Aerospace Materials and Material Technologies	Yes
Zirconium (Zr)
North American T-37 Tweet	Estimated Amount	Primary Use in T-37 Tweet	References
Element	~1–2 kg	Permanent magnets in actuators, sensors, and avionics systems	Rare Earth Elements in the Air and Space Industry: A Brief Review	Yes
Neodymium (Nd)	~0.1–0.2 kg	Enhances thermal stability of NdFeB magnets in high-temperature environments	Rare Earth Elements in the Air and Space Industry: A Brief Review	Yes
Dysprosium (Dy)	~0.1–0.2 kg	Samarium–cobalt magnets in high-temperature electronics	Rare Earth Elements in the Air and Space Industry: A Brief Review	Yes
Samarium (Sm)	Grams to tens of grams	Phosphors in cockpit displays and lighting systems	Rare Earth Elements in the Air and Space Industry: A Brief Review	Yes
Yttrium (Y)	Grams to tens of grams	Red phosphors in display systems	Rare Earth Elements in the Air and Space Industry: A Brief Review	Yes
Europium (Eu)	Grams to tens of grams	Green phosphors in display systems	Rare Earth Elements in the Air and Space Industry: A Brief Review	Yes
Terbium (Tb)	~100–200 grams	Alloying agent in permanent magnets	Rare Earth Elements in the Air and Space Industry: A Brief Review	Yes
Praseodymium (Pr)	~200–300 grams	Components in high-performance sensors and actuators	Rare Earth Elements in the Air and Space Industry: A Brief Review	Yes
Gadolinium (Gd)	~0.5–1 kg	Polishing compounds for display screens and optical components	Rare Earth Elements in the Air and Space Industry: A Brief Review	Yes
Cerium (Ce)	~0.2–0.5 kg	Battery electrodes and optical glass	Rare Earth Elements in the Air and Space Industry: A Brief Review	Yes
Lanthanum (La)	~1,000–2,000 kg	Structural components and armor plating	Cessna T-37B Tweet - Air Force Museum	No
Titanium (Ti)	~100–200 kg	Superalloys for turbine blades and engine components	Aerospace Materials and Material Technologies	Yes
Nickel (Ni)	~50–100 kg	High-temperature alloys for jet engines	Aerospace Materials and Material Technologies	Yes
Cobalt (Co)	~50–100 kg	Counterweights and armor-piercing ammunition	How an A-10's depleted uranium rounds turn tank armor against itself	No
Tungsten (W)	~200–400 kg	Stainless steel, structural supports, engine parts	Aerospace Materials and Material Technologies	Yes
Chromium (Cr)	~100–200 kg	Alloying element in structural parts	Aerospace Materials and Material Technologies	Yes
Manganese (Mn)	~2–5 kg	Backup battery systems and emergency electronics	Aerospace Materials and Material Technologies	Yes
Lithium (Li)	~1–2 kg	Turbine blade alloys for heat resistance	Aerospace Materials and Material Technologies	Yes
Hafnium (Hf)	~0.5–1 kg	High-performance superalloys in engine components	Aerospace Materials and Material Technologies	Yes
Rhenium (Re)	~10–20 kg	Corrosion-resistant alloys in engine components and structural supports	Aerospace Materials and Material Technologies	Yes
Molybdenum (Mo)	~5–10 kg	Alloys for high-temperature applications and in certain advanced composites	Aerospace Materials and Material Technologies	Yes
Zirconium (Zr)
Boeing B-1B Lancer	Estimated Quantity	Primary Use in B-1B Lancer	References	No
Element	~5–10 kg	Permanent magnets in actuators, sensors, and avionics systems	Defense Supply Chain Assessment	No
Neodymium (Nd)	~1–2 kg	Samarium–cobalt magnets in high-temperature electronics	Defense Supply Chain Assessment	No
Samarium (Sm)	~0.5–1 kg	Enhances thermal stability of NdFeB magnets in high-temperature environments	Defense Supply Chain Assessment	No
Dysprosium (Dy)	Grams to tens of grams	Phosphors in cockpit displays and lighting systems	Defense Supply Chain Assessment	No
Yttrium (Y)	Grams to tens of grams	Red phosphors in display systems	Defense Supply Chain Assessment	No
Europium (Eu)	Grams to tens of grams	Green phosphors in display systems	Defense Supply Chain Assessment	No
Terbium (Tb)	~300–600 grams	Alloying agent in permanent magnets	Defense Supply Chain Assessment	No
Praseodymium (Pr)	~500–800 grams	Components in high-performance sensors and actuators	Defense Supply Chain Assessment	No
Gadolinium (Gd)	~1–3 kg	Polishing compounds for display screens and optical components	Defense Supply Chain Assessment	No
Cerium (Ce)	~0.5–1.5 kg	Battery electrodes and optical glass	Defense Supply Chain Assessment	No
Lanthanum (La)	~40,000 lb (18,144 kg)	Structural components and armor plating	A century of progress in aircraft materials - Part 2 Metals	No
Titanium (Ti)	~800–1,200 kg	Superalloys for turbine blades and engine components	Aerospace Materials and Material Technologies	Yes
Nickel (Ni)	~200–300 kg	High-temperature alloys for jet engines	Aerospace Materials and Material Technologies	Yes
Cobalt (Co)	~300–500 kg	Counterweights and armor-piercing ammunition	How an A-10's depleted uranium rounds turn tank armor against itself	No
Tungsten (W)	~1,500–2,500 kg	Stainless steel, structural supports, engine parts	Aerospace Materials and Material Technologies	Yes
Chromium (Cr)	~800–1,500 kg	Alloying element in structural parts	Aerospace Materials and Material Technologies	Yes
Manganese (Mn)	~5–10 kg	Backup battery systems and emergency electronics	Aerospace Materials and Material Technologies	Yes
Lithium (Li)	~10–20 kg	Turbine blade alloys for heat resistance	Aerospace Materials and Material Technologies	Yes
Hafnium (Hf)	~2–4 kg	High-performance superalloys in engine components	Aerospace Materials and Material Technologies	Yes
Rhenium (Re)	~50–100 kg	Corrosion-resistant alloys in engine components and structural supports	Aerospace Materials and Material Technologies	Yes
Molybdenum (Mo)	~20–40 kg	Alloys for high-temperature applications and in certain advanced composites	Aerospace Materials and Material Technologies	Yes
Zirconium (Zr)
McDonnell Douglas AV-8B Harrier II	Estimated Quantity	Primary Use in AV-8B Harrier II	References
Element	~2–4 kg	Permanent magnets in actuators, sensors, and avionics systems	Rare Earth Elements in the Air and Space Industry: A Brief Review	Yes
Neodymium (Nd)	~0.5–1 kg	Samarium–cobalt magnets in high-temperature electronics	Rare Earth Elements in the Air and Space Industry: A Brief Review	Yes
Samarium (Sm)	~0.2–0.5 kg	Enhances thermal stability of NdFeB magnets in high-temperature environments	Rare Earth Elements in the Air and Space Industry: A Brief Review	Yes
Dysprosium (Dy)	Grams to tens of grams	Phosphors in cockpit displays and lighting systems	Rare Earth Elements in the Air and Space Industry: A Brief Review	Yes
Yttrium (Y)	Grams to tens of grams	Red phosphors in display systems	Rare Earth Elements in the Air and Space Industry: A Brief Review	Yes
Europium (Eu)	Grams to tens of grams	Green phosphors in display systems	Rare Earth Elements in the Air and Space Industry: A Brief Review	Yes
Terbium (Tb)	~100–200 grams	Alloying agent in permanent magnets	Rare Earth Elements in the Air and Space Industry: A Brief Review	Yes
Praseodymium (Pr)	~200–300 grams	Components in high-performance sensors and actuators	Rare Earth Elements in the Air and Space Industry: A Brief Review	Yes
Gadolinium (Gd)	~0.5–1 kg	Polishing compounds for display screens and optical components	Rare Earth Elements in the Air and Space Industry: A Brief Review	Yes
Cerium (Ce)	~0.2–0.5 kg	Battery electrodes and optical glass	Rare Earth Elements in the Air and Space Industry: A Brief Review	Yes
Lanthanum (La)	~1,500–2,500 kg	Structural components and airframe	A century of progress in aircraft materials - Part 2 Metals	No
Titanium (Ti)	~100–200 kg	Superalloys for turbine blades and engine components	Aerospace Materials and Material Technologies	Yes
Nickel (Ni)	~50–100 kg	High-temperature alloys for jet engines	Aerospace Materials and Material Technologies	Yes
Cobalt (Co)	~50–100 kg	Counterweights and armor-piercing ammunition	How an A-10's depleted uranium rounds turn tank armor against itself	No
Tungsten (W)	~200–400 kg	Stainless steel, structural supports, engine parts	Aerospace Materials and Material Technologies	Yes
Chromium (Cr)	~100–200 kg	Alloying element in structural parts	Aerospace Materials and Material Technologies	Yes
Manganese (Mn)	~2–5 kg	Backup battery systems and emergency electronics	Aerospace Materials and Material Technologies	Yes
Lithium (Li)	~1–2 kg	Turbine blade alloys for heat resistance	Aerospace Materials and Material Technologies	Yes
Hafnium (Hf)	~0.5–1 kg	High-performance superalloys in engine components	Aerospace Materials and Material Technologies	Yes
Rhenium (Re)	~10–20 kg	Corrosion-resistant alloys in engine components and structural supports	Aerospace Materials and Material Technologies	Yes
Molybdenum (Mo)	~5–10 kg	Alloys for high-temperature applications and in certain advanced composites	Aerospace Materials and Material Technologies	Yes
Zirconium (Zr)
